# Supplementary material for: Chronic Ambient Poisoning
Source: Preprints.org preprint supplement (doi:10.20944/preprints202205.0146.v1), 2022-05-11
Supplement: Supplementary file 1 [file supplementary]

## SUPPLEMENTAL TEXT

### Cure Blog

While the author was finding her way to cure, she maintained a blog and so documented the discovery of her chemical food poisoning. That poisoning was reversed by eating organic foods, which eliminated daily neuritis in lower legs, round-the-clock brain fog, and ongoing gastrointestinal symptoms, and led to a several-year remission before asthma and neurotoxicity recurred. That recurrence was followed by discovery of her non-ionizing radiation poisoning. See *Chronic Ambient Poisoning: a new diagnosis and a first step toward curing chronic illness* for a record of the second phase of discovery.

Cure Blog: <https://mysearchforcure.wordpress.com/>

### Extended Figure Legends

#### Key to Figure 1:

**Ingestion** of food, drink, and substances contaminated by man-made chemicals from sources such as: agricultural herbicides, pesticides, or genetically engineered toxin-producing organisms; animals husbanded with antibiotics, hormones or chemicals in their feed, dips, sprays, pastures, or structures; foods preserved or processed with chemicals; and foods contaminated in cooking, as through use of high temperature oils.

**Inhalation** of air contaminants due to spontaneous or human-produced chemicals such as volcanic ash, smoky fires, or sulfur dioxide.

**Penetration** by non-ionizing radiation that may damage any or all biological processes, each likely in proportion to: cumulative does at each wavelength summed across a specific range of wavelengths; peak exposures; and susceptibility factors such as prior poisoning by “sick buildings”.

**Release** of stored fat-soluble poisons with catabolism (e.g. between meals, overnight, prolonged physical activity, fasting, starvation, hyperthyroidism, etc.).

**Circulation** in blood and bodily fluids of levels that depend on intrinsic and extrinsic factors such as: genes and gene regulation; nutritional status; circulatory fitness; efficiency of excretion; recent exposure to inducers of gene expression such as alcohol, cigarettes, etc.; and past medical history (including intrauterine experiences).

#### Key to Figure 2:

Examples of consequences (signs, symptoms, and labels) in variants of Alderman syndrome:

#### Nervous System

**Central:** Confusion; loss of focus and ability to multi-task (brain fog); disorientation to time and place; failure to form new memories; periodic anomia with word substitution and loss of language fluency; circumlocution and tangential and garrulous speech; spatial confusion with loss of map-reading ability and facial recognition; tremors; tipping or falling to one side; inability to walk straight with eyes closed; loss of automatic adjustment to flow of traffic; disruption of thirst, hunger, and/or satiety with dehydration and/or weight change; pseudo-herpetic mouth ulcers, exaggerated sense of smell (hyperosmia); fumbles; falls; wide-based gait.

**Peripheral:** Dysesthesias; pain; fasciculations; hyperreflexia; hypersensitivity.

**Autonomic:** Adrenal exhaustion; elevated corticosteroid levels; lid lag; decreased blood pressure; poor response to postural change; difficulty swallowing; intestinal stasis; incomplete voiding on urination.

*May carry labels such as peripheral (and/or cranial) neuritis or neuropathy; degenerative neurological diseases like MS, ALs, ADHD; Parkinson's disease; dementia; thought or mood disorders; or suicide.*

### **Gastrointestinal**

Loss of symbionts that aid digestion, produce nutrients, and protect the gut from toxins, allergens, and pathogens; overgrowth of organisms that produce toxins, bloating, food cravings, and alternating constipation and diarrhea; aggravation by antibiotic use, poor inoculation in infancy, and poor replenishment by soils; inflammation of gut lining.

*May carry labels such as gastritis, reflux (GERD), functional/irritable bowel syndrome, food intolerances; nutrient deficiencies, food or systemic allergies with rash and asthma, yeast overgrowth, or leaky bowel syndrome.*

### **Immune System and Allergy**

Asthma: food allergies; leaky bowel with circulating immune complexes—pruritic rash, bronchospasm, changes in T-cell fractions; low WBC count.

*May carry labels such as asthma, allergies, or immune dysfunction.*

### **Musculoskeletal System**

Myalgias, arthralgias, myofascial tenderness (trigger points); exercise intolerance due to poisons blocking electrotransport chain, with increased fat mobilization that increases poisons.

*May carry labels such as mitochondrial dysfunction (mito).*

### **Other**

Night sweats; "flu"; nausea; headache; loss of alertness; sleep disturbances; episodic and diurnal flares; recurrent vaginitis due to GI yeast overgrowth; urinary tract infections secondary to microbiome degradation or poor voiding; mild hypothyroidism; hypoglycemic episodes; obesity due to avoidance of catabolism and toxin release; mouth ulcers; rhinitis; sinus headaches; gingivitis; and gingival recession.

*May carry labels such as ME, CFS, CFIDS, FM, MCS, EHS, mental illness, or neurotoxicity.*
